# Supplementary material for: Association between antioxidant metabolites and N-terminal fragment brain natriuretic peptides in insulin-resistant individuals
Source: PubMed Central journal article supplement — Cardiovasc Endocrinol Metab. 2024 May 2;13(2):e0303. doi: 10.1097/XCE.0000000000000303 (PMC11068140; doi:10.1097/xce.0000000000000303), 2024-05-02
Supplement: xce-13-e0303-s001.pdf [file xce-13-e0303-s001.pdf]

## Supplementary materials

**Table S1.** Correlation of NT-proBNP and clinical traits

| Clinical traits            | Spearman's rho | p-value                |
|----------------------------|----------------|------------------------|
| Hematocrit                 | -0.455         | $2.19 \times 10^{-21}$ |
| Hemoglobin                 | -0.446         | $1.34 \times 10^{-20}$ |
| Alanine transferase        | -0.409         | $2.67 \times 10^{-17}$ |
| Creatinine                 | -0.406         | $5.23 \times 10^{-17}$ |
| Red Blood Cell             | -0.380         | $6.24 \times 10^{-15}$ |
| Uric Acid                  | -0.353         | $5.56 \times 10^{-13}$ |
| Alkaline Phosphatase       | -0.345         | $2.11 \times 10^{-12}$ |
| HDL Cholesterol            | 0.329          | $2.34 \times 10^{-11}$ |
| Triglyceride               | -0.328         | $2.46 \times 10^{-11}$ |
| Insulin                    | -0.328         | $2.56 \times 10^{-11}$ |
| Creatine Kinase            | -0.332         | $8.82 \times 10^{-10}$ |
| C Peptide                  | -0.300         | $1.76 \times 10^{-9}$  |
| GGT                        | -0.410         | $5.60 \times 10^{-8}$  |
| Urea                       | -0.251         | $4.48 \times 10^{-7}$  |
| Total Protein              | -0.234         | $2.68 \times 10^{-6}$  |
| Aspartate aminotransferase | -0.223         | $7.91 \times 10^{-6}$  |
| Albumin                    | -0.208         | $3.26 \times 10^{-5}$  |
| Average systolic BP        | -0.192         | $1.32 \times 10^{-4}$  |
| Glucose                    | -0.175         | $4.75 \times 10^{-4}$  |
| LDL Cholesterol Calc       | -0.157         | $1.83 \times 10^{-3}$  |
| Average pulse rate         | -0.153         | $2.39 \times 10^{-3}$  |
| Total Cholesterol          | -0.144         | $4.27 \times 10^{-3}$  |
| Average diastolic BP       | -0.139         | $5.68 \times 10^{-3}$  |

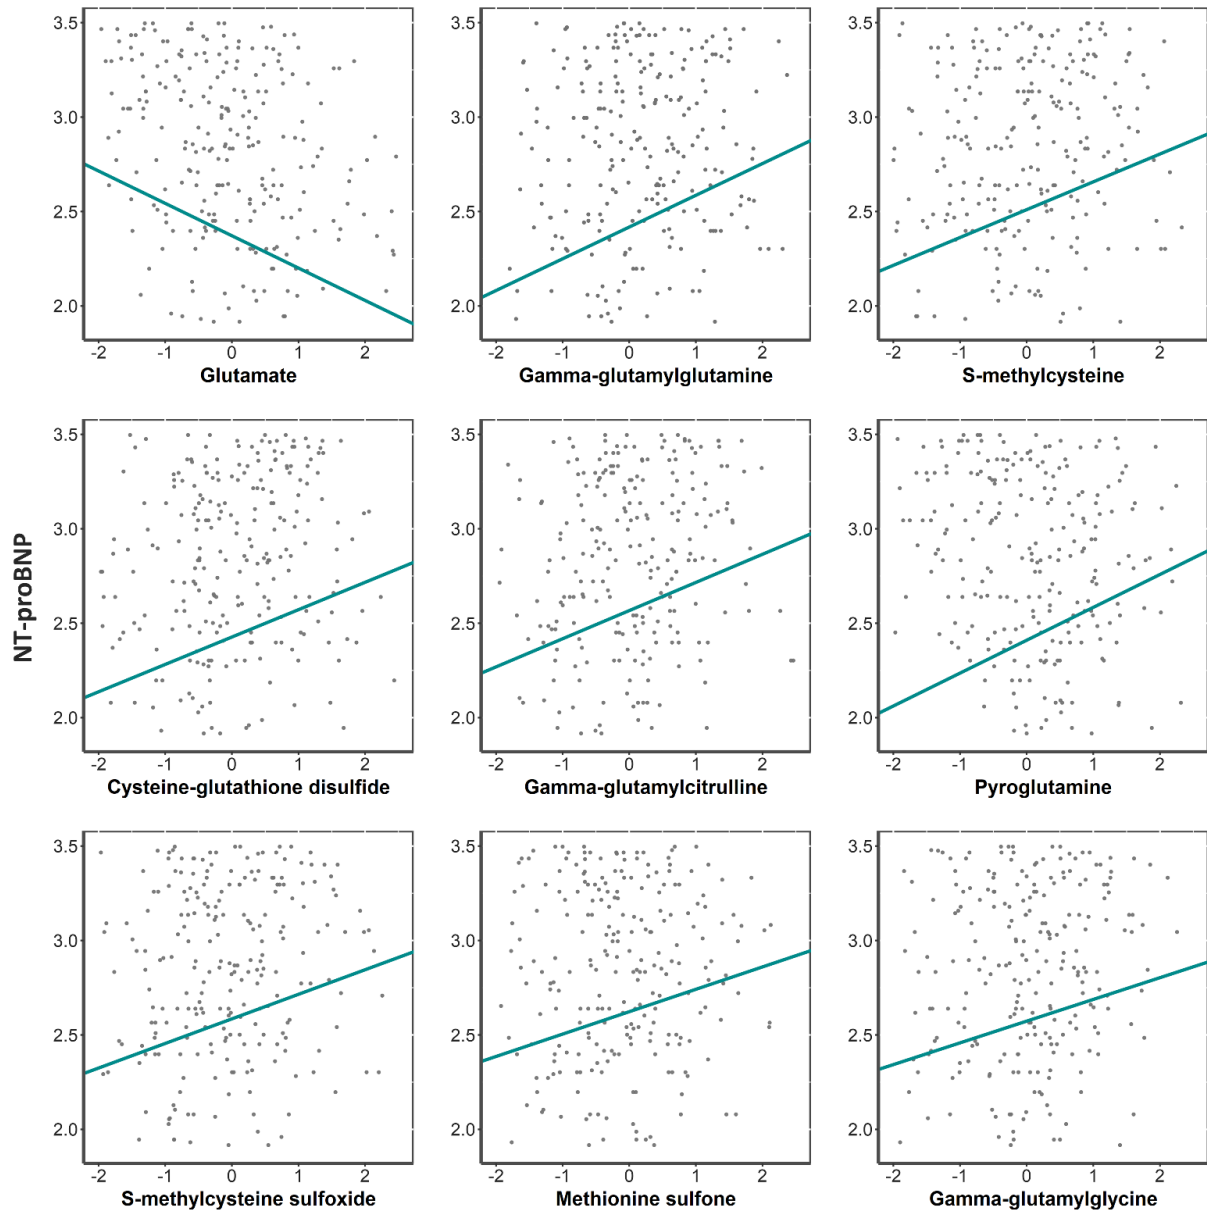

**Figure S1.** Scatterplot of NT-proBNP vs significant metabolites from linear regression analysis. Green line represents the slope (estimate), which explains the direction and the effect of the metabolites on NT-proBNP (FDR < 0.05).

**Table S2.** Metabolites that are significantly different between IS and IR groups.

| Metabolite                     | Super-pathway                                    | Estimate | SE    | p-value                | FDR                    |
|--------------------------------|--------------------------------------------------|----------|-------|------------------------|------------------------|
| gamma-glutamylphenylalanine    | Gamma-glutamyl Amino Acid                        | 0.789    | 0.099 | 1.53×10 <sup>-14</sup> | 3.67×10 <sup>-13</sup> |
| gamma-glutamylisoleucine*      | Gamma-glutamyl Amino Acid                        | 0.703    | 0.096 | 1.33×10 <sup>-12</sup> | 2.40×10 <sup>-11</sup> |
| gamma-glutamyltyrosine         | Gamma-glutamyl Amino Acid                        | 0.749    | 0.103 | 1.99×10 <sup>-12</sup> | 2.86×10 <sup>-11</sup> |
| gamma-glutamylleucine          | Gamma-glutamyl Amino Acid                        | 0.666    | 0.097 | 2.14×10 <sup>-11</sup> | 2.20×10 <sup>-10</sup> |
| gamma-glutamylcitrulline*      | Gamma-glutamyl Amino Acid                        | -0.666   | 0.101 | 1.61×10 <sup>-10</sup> | 1.29×10 <sup>-09</sup> |
| gamma-glutamylmethionine       | Gamma-glutamyl Amino Acid                        | 0.661    | 0.109 | 3.10×10 <sup>-09</sup> | 2.24×10 <sup>-08</sup> |
| gamma-glutamylvaline           | Gamma-glutamyl Amino Acid                        | 0.588    | 0.098 | 4.50×10 <sup>-09</sup> | 2.95×10 <sup>-08</sup> |
| gamma-glutamylalanine          | Gamma-glutamyl Amino Acid                        | 0.630    | 0.139 | 7.83×10 <sup>-06</sup> | 3.32×10 <sup>-05</sup> |
| gamma-glutamyltryptophan       | Gamma-glutamyl Amino Acid                        | 0.529    | 0.131 | 7.29×10 <sup>-05</sup> | 2.28×10 <sup>-04</sup> |
| gamma-glutamylhistidine        | Gamma-glutamyl Amino Acid                        | 0.390    | 0.106 | 2.63×10 <sup>-04</sup> | 7.89×10 <sup>-04</sup> |
| gamma-glutamylglutamate        | Gamma-glutamyl Amino Acid                        | 0.350    | 0.099 | 4.41×10 <sup>-04</sup> | 1.27×10 <sup>-03</sup> |
| gamma-glutamyl-2-aminobutyrate | Gamma-glutamyl Amino Acid                        | -0.361   | 0.115 | 1.75×10 <sup>-03</sup> | 4.19×10 <sup>-03</sup> |
| gamma-glutamylglutamine        | Gamma-glutamyl Amino Acid                        | -0.317   | 0.109 | 3.67×10 <sup>-03</sup> | 8.02×10 <sup>-03</sup> |
| gamma-glutamylglycine          | Gamma-glutamyl Amino Acid                        | -0.309   | 0.113 | 6.31×10 <sup>-03</sup> | 1.19×10 <sup>-02</sup> |
| glutamate                      | Glutamate Metabolism                             | 0.883    | 0.100 | 4.10×10 <sup>-17</sup> | 1.48×10 <sup>-15</sup> |
| 4-hydroxyglutamate             | Glutamate Metabolism                             | 0.716    | 0.123 | 1.45×10 <sup>-08</sup> | 8.01×10 <sup>-08</sup> |
| N-acetylglutamate              | Glutamate Metabolism                             | 0.521    | 0.117 | 1.12×10 <sup>-05</sup> | 4.49×10 <sup>-05</sup> |
| pyroglutamine*                 | Glutamate Metabolism                             | -0.293   | 0.085 | 6.23×10 <sup>-04</sup> | 1.73×10 <sup>-03</sup> |
| carboxyethyl-GABA              | Glutamate Metabolism                             | 0.355    | 0.113 | 1.82×10 <sup>-03</sup> | 4.23×10 <sup>-03</sup> |
| beta-citrylglutamate           | Glutamate Metabolism                             | 0.351    | 0.121 | 3.90×10 <sup>-03</sup> | 8.02×10 <sup>-03</sup> |
| cysteine-glutathione disulfide | Glutathione Metabolism                           | -0.589   | 0.112 | 2.46×10 <sup>-07</sup> | 1.18×10 <sup>-06</sup> |
| cysteinylglycine               | Glutathione Metabolism                           | 0.523    | 0.118 | 1.32×10 <sup>-05</sup> | 5.02×10 <sup>-05</sup> |
| 2-aminobutyrate                | Glutathione Metabolism                           | -0.341   | 0.112 | 2.55×10 <sup>-03</sup> | 5.73×10 <sup>-03</sup> |
| 5-oxoproline                   | Glutathione Metabolism                           | -0.315   | 0.111 | 4.69×10 <sup>-03</sup> | 9.39×10 <sup>-03</sup> |
| methionine sulfoxide           | Methionine, Cysteine, SAM and Taurine Metabolism | 1.005    | 0.108 | 8.79×10 <sup>-19</sup> | 6.33×10 <sup>-17</sup> |
| S-methylcysteine               | Methionine, Cysteine, SAM and Taurine Metabolism | -0.764   | 0.114 | 6.81×10 <sup>-11</sup> | 6.13×10 <sup>-10</sup> |
| methionine                     | Methionine, Cysteine, SAM and Taurine Metabolism | 0.653    | 0.112 | 1.17×10 <sup>-08</sup> | 7.04×10 <sup>-08</sup> |
| cystathionine                  | Methionine, Cysteine, SAM and Taurine Metabolism | 0.700    | 0.121 | 1.76×10 <sup>-08</sup> | 9.05×10 <sup>-08</sup> |
| S-methylcysteine sulfoxide     | Methionine, Cysteine, SAM and Taurine Metabolism | -0.564   | 0.112 | 6.94×10 <sup>-07</sup> | 3.12×10 <sup>-06</sup> |
| cysteine                       | Methionine, Cysteine, SAM and Taurine Metabolism | 0.448    | 0.110 | 5.54×10 <sup>-05</sup> | 1.81×10 <sup>-04</sup> |
| S-carboxyethylcysteine         | Methionine, Cysteine, SAM and Taurine Metabolism | 0.367    | 0.111 | 1.02×10 <sup>-03</sup> | 2.72×10 <sup>-03</sup> |
| methionine sulfone             | Methionine, Cysteine, SAM and Taurine Metabolism | -0.305   | 0.109 | 5.35×10 <sup>-03</sup> | 1.04×10 <sup>-02</sup> |
| S-adenosylhomocysteine (SAH)   | Methionine, Cysteine, SAM and Taurine Metabolism | 0.285    | 0.106 | 7.79×10 <sup>-03</sup> | 1.44×10 <sup>-02</sup> |
